# Supplementary material for: In vitro concentration dependent detection of creatinine: a surface enhanced Raman scattering and fluorescence study
Source: Royal Society of Chemistry journal article supplement (doi:10.1039/c6ra22886k), 2016-01-01
Supplement: c6ra22886k1.pdf [file c6ra22886k1.pdf]

***In vitro* concentration dependent detection of creatinine: a surface enhanced Raman scattering and fluorescence study**

Debraj Gangopadhyay, Poornima Sharma, Rajib Nandi, Moumita Das, Surajit Ghosh and Ranjan

K. Singh\*

*Department of Physics, Banaras Hindu University, Varanasi - 221005, India*

\***Correspondence to:** Prof. Ranjan Kumar Singh, Department of Physics, Banaras Hindu University, Varanasi-221005, India. E-mail: [ranjanksingh65@rediffmail.com](mailto:ranjanksingh65@rediffmail.com), Phone No.: +915426701569

**SUPPORTING INFORMATION**

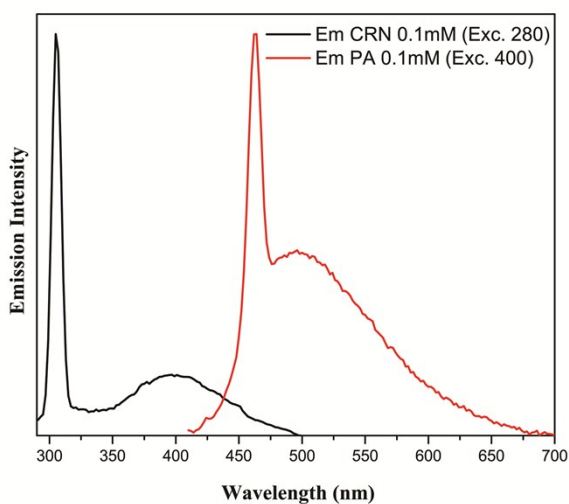

**Fig. S1:** Fluorescence emission spectra of CRN (with excitation wavelength 280 nm) and PA (with excitation wavelength 400 nm) which show emission peaks at ~400 and ~500 nm respectively

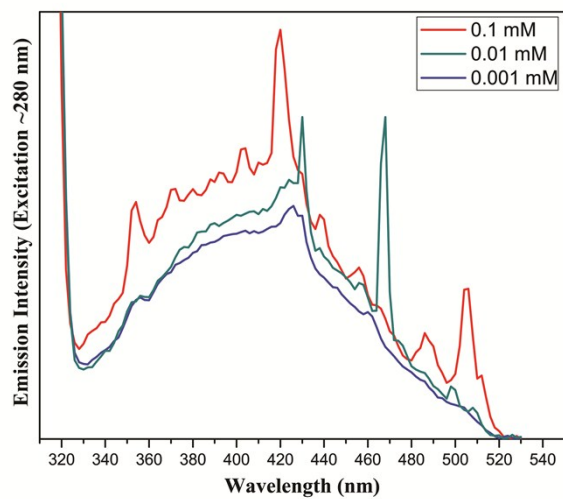

**Fig. S2:** Fluorescence emission spectra of the Jaffe complexes prepared using three different concentrations of CRN (0.1, 0.01 and 0.001 mM) with 0.1 mM PA and NaOH excited by 280 nm
